# Supplementary material for: Gold nanoparticle-modified TiO2/SBA-15 nanocomposites as active plasmonic photocatalysts for the selective oxidation of aromatic alcohols
Source: Royal Society of Chemistry journal article supplement (doi:10.1039/c6ra11390g), 2016-01-01
Supplement: c6ra11390g1.pdf [file c6ra11390g1.pdf]

Electronic Supplementary Informations for

**Gold nanoparticles-modified TiO<sub>2</sub>/SBA-15 nanocomposites as active plasmonic photocatalysts for the selective oxidation of aromatic alcohols**

Yu Chen, Weizun Li, Jingyu Wang, Qian Yang, Qidong Hou, Meiting Ju \*

College of Environmental Science and Engineering, Nankai University, Tianjin 300071, China

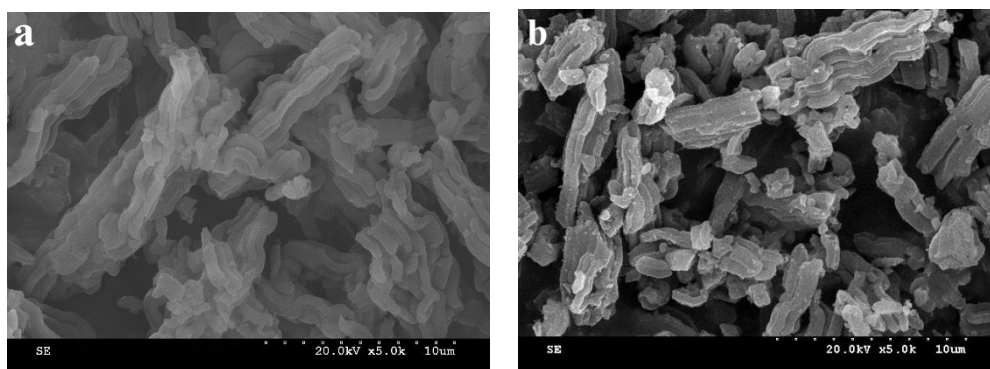

Figure S1 SEM image of the pristine SBA-15 and Au/TiO<sub>2</sub>/SBA-15.

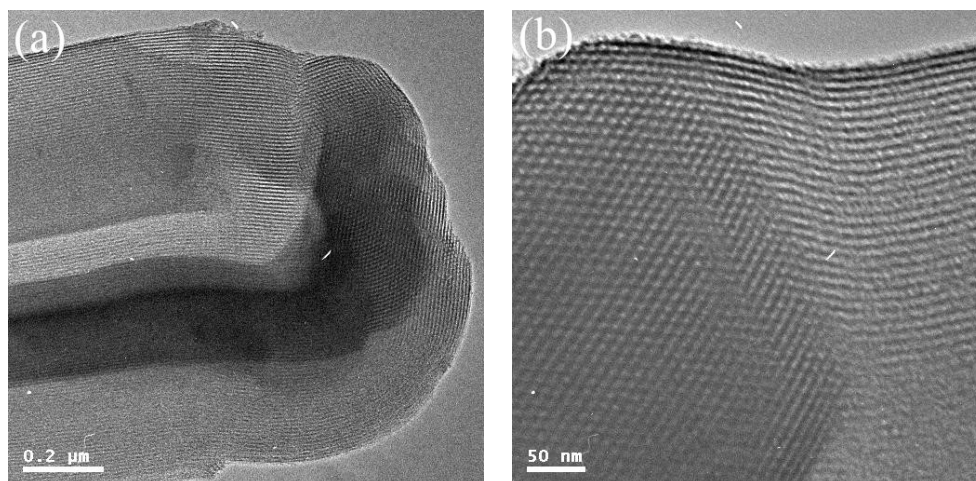

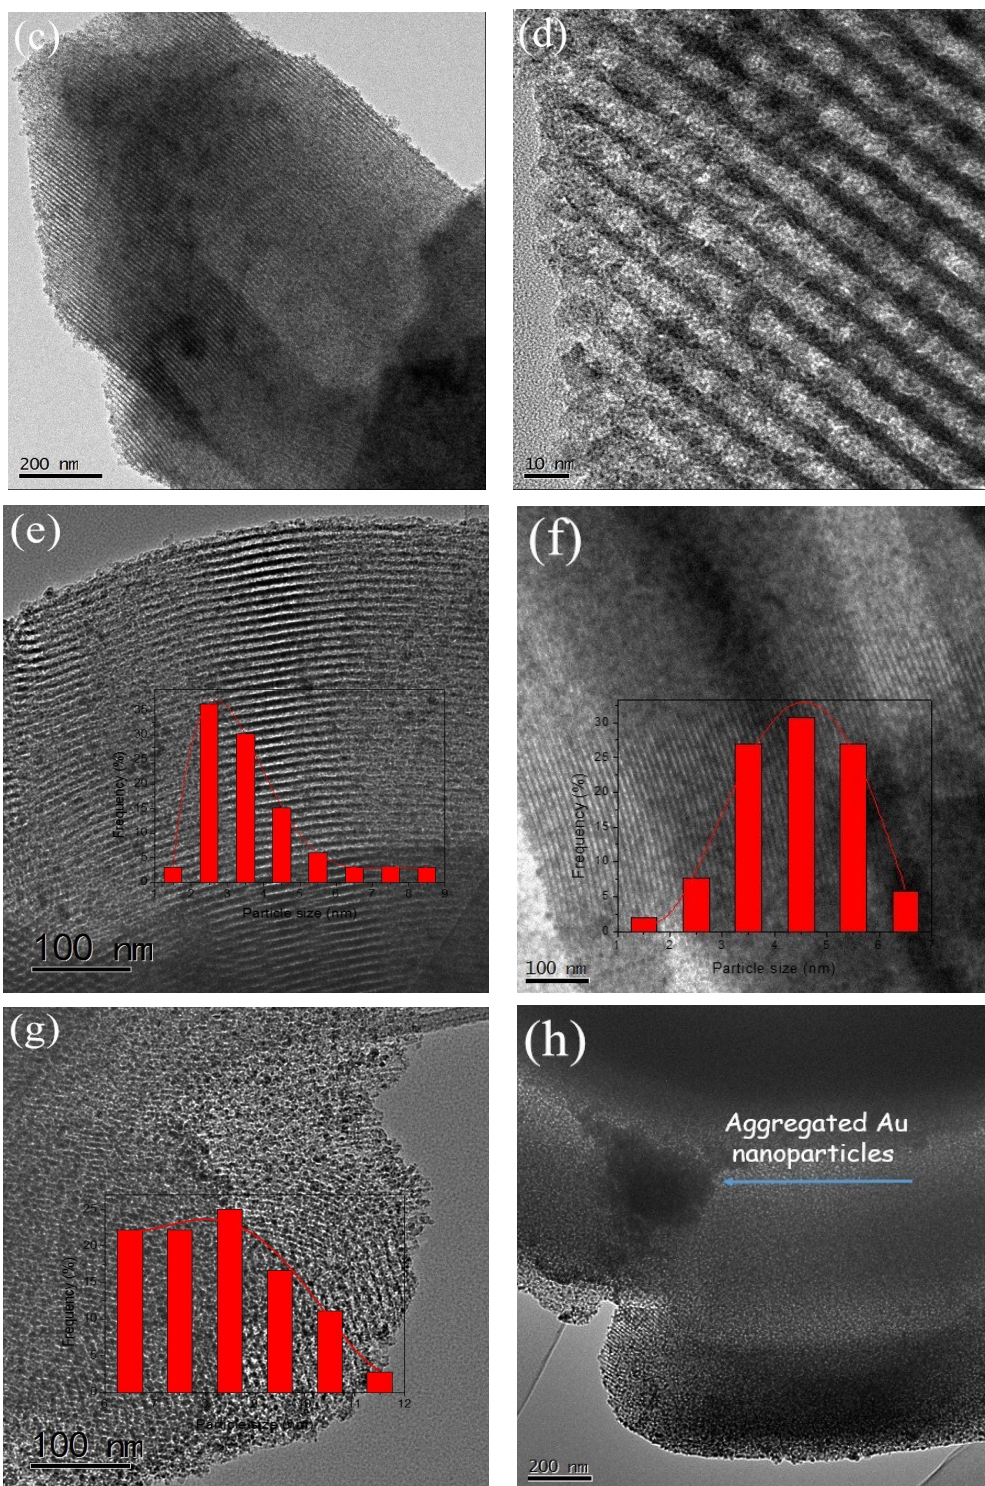

Fig S2 TEM and HRTEM of pristine SBA-15 (a)(b), TiO<sub>2</sub>/SBA-15(c)(d), Au<sub>0.5</sub>/TiO<sub>2</sub>/SBA-15(e), Au<sub>1</sub>/TiO<sub>2</sub>/SBA-15(f), Au<sub>5</sub>/TiO<sub>2</sub>/SBA-15(g), and Au<sub>2</sub>/TiO<sub>2</sub>/SBA-15-PD(h).

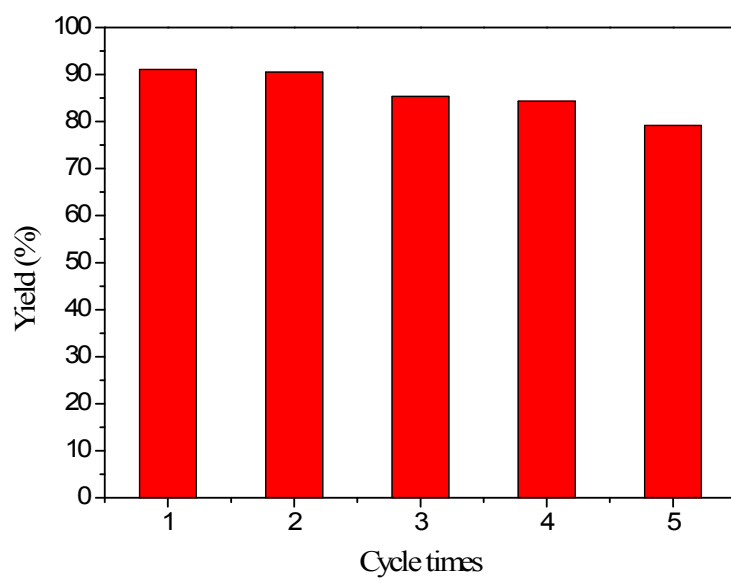

Fig S3 Recyclability tests of Au<sub>2</sub>/TiO<sub>2</sub>/SBA-15 for the selective oxidation of benzyl alcohol.
